# Supplementary material for: Controlling crystal growth of MIL-100(Fe) on Ag nanowire surface for optimizing catalytic performance
Source: Royal Society of Chemistry journal article supplement (doi:10.1039/d0ra04211k), 2020-01-01
Supplement: d0ra04211k1.pdf [file d0ra04211k1.pdf]

## Electronic Supplementary Information

# Controlling crystal growth of MIL-100(Fe) on Ag nanowire surface for optimizing catalytic performance

Xi Chen,<sup>\*,1</sup> Yanshuang Zhang,<sup>1</sup> Xiangyun Kong,<sup>1</sup> Zanru Guo,<sup>1</sup> Wenyuan Xu,<sup>1</sup> Zhili Fang,<sup>1</sup> Shaohui Wang,<sup>1</sup> Lingzhi Liu,<sup>2</sup> Yongxin Liu<sup>\*,1</sup> and Jiali Zhang<sup>\*,1</sup>

<sup>1</sup>School of Materials Science and Engineering, East China Jiaotong University,  
Shuanggang Road 808, Nanchang, 330013, People's Republic of China

<sup>2</sup>State Key Laboratory of Polymer Physics and Chemistry, Changchun Institute of Applied Chemistry, Chinese Academy of Sciences, Renmin Street 5625, Changchun 130022, People's Republic of China

## Materials and instrumentation

Trimesic acid (98%), ferric chloride ( $\text{FeCl}_3$ , >95%), ferrous chloride ( $\text{FeCl}_2 \cdot 4\text{H}_2\text{O}$ , >95%), Sodium hydroxide ( $\text{NaOH}$ , 97%), Silver nitrate ( $\text{AgNO}_3$ , >95%), ethylene glycol (EG, AR), acetone and ethanol were purchased from Chinese domestic suppliers. Polyvinylpyrrolidone (PVP,  $M_w = 40000$ , reagent grade) was purchased from TCI.

Powder X-ray diffraction patterns (XRD) of the products were obtained on a Bruker D8 Focus diffractometer equipped with  $\text{Cu K}\alpha$  radiation and a Lynx Eye detector. Field-emission scanning electron microscopy (FESEM) and Transmission electron microscopy (TEM) images were observed on a Hitachi su8010 scanning electron microscope and a FEI Tecnai F20 transmission electron microscopy, respectively. Thermogravimetric analyses (TGA) were performed with a Netzsch STA 449 F3 instrument under flowing air with a heating rate of  $10\text{ }^\circ\text{C min}^{-1}$ .  $\text{N}_2$  adsorption measurements were performed with a Micromeritics ASAP2020 instrument surface area analyzer at 77K. The Brunauer–Emmett–Teller (BET) method was used to calculate the specific surface area. The concentration of 4-nitrophenol was measured by UV-Vis spectroscopy (UNICO UV-4802S). FT-IR spectra were registered on a PerkinElmer Spectrum Two FT-IR (USA) spectrophotometer in the scanning range of  $4000\text{-}500\text{ cm}^{-1}$  using KBr pellet method. X-ray photoelectron spectra (XPS) were acquired with a PHI 5702 spectrometer equipped with an Al K  $\alpha$  exciting source.

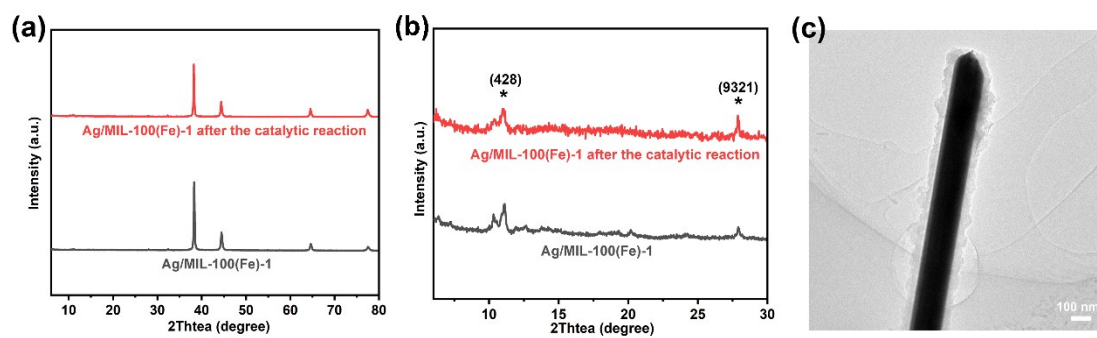

**Fig. S1** XRD patterns (a, b) and TEM image of Ag/MIL-100(Fe)-1 after the catalytic reaction.

To better define the diffraction peaks of MIL-100(Fe), a magnified figure of the XRD pattern with a  $2\theta$  range of 5-30° is provided in Figure S1b, in which the peaks at 11° (428) and 27.7° (9321) corresponding to the intrinsic MIL-100(Fe) crystals as reported previously are maintained after the catalytic reaction.
